# Supplementary material for: Green synthesis of nanoscale anion exchange resin for sustainable water purification
Source: Royal Society of Chemistry journal article supplement (doi:10.1039/c8ew00593a), 2018-01-01
Supplement: c8ew00593a1.pdf [file c8ew00593a1.pdf]

Supplementary Information

# Green synthesis of Nanoscale Anion Exchange Resin for Sustainable Water Purification.

*Abhispa Sahu,<sup>a</sup> Blackburn Kayla, Durkin Kayla, Tim B. Eldred,<sup>a</sup> Billy R. Johnson,<sup>a</sup> Sheikh Rabia, James E. Amburgey,<sup>b</sup> and Jordan C. Poler<sup>a\*</sup>*

<sup>a</sup> Department of Chemistry, University of North Carolina at Charlotte, Charlotte, NC

<sup>b</sup> Department of Civil and Environmental Engineering, University of North Carolina at Charlotte, Charlotte, NC

<sup>a\*</sup> Corresponding Author: Department of Chemistry, University of North Carolina at Charlotte, Charlotte, NC Fax: (704) 687-0960; Tel: (704) 687-8289; E-mail: [jcpoler@uncc.edu](mailto:jcpoler@uncc.edu)

KEYWORDS

**Water purification, NOM removal, adsorption, ion-exchange, SWCNT, poly(vbTMAC), kinetics, disinfection byproducts**

## LIST OF ABBREVIATIONS

|                    |                                               |
|--------------------|-----------------------------------------------|
| ARGET              | activators regenerated by electron transfer   |
| ATRP               | atom transfer radical polymerization          |
| DBP                | disinfection byproduct                        |
| DLS                | dynamic light scattering                      |
| DMF                | N,N-dimethylformamide                         |
| HAA                | haloacetic acid                               |
| HEBiB              | 2-hydroxyethyl 2-bromoisobutyrate             |
| HiPCO              | high pressure carbon monoxide                 |
| mg-C/L             | milligrams of carbon per liter of solution    |
| MWCO               | molecular weight cutoff                       |
| NaFL               | sodium fluorescein                            |
| <sup>1</sup> H NMR | nuclear magnetic resonance                    |
| NOM                | natural organic matter                        |
| SEM                | scanning electron microscopy                  |
| FE-SEM             | Field emission-scanning electron microscopy   |
| SWCNT              | single-walled carbon nanotube                 |
| THM                | trihalomethane                                |
| TOC                | total organic carbon                          |
| TPMA               | tris(2-pyridylmethyl)amine                    |
| USEPA              | United States Environmental Protection Agency |
| vbTMAC             | vinylbenzyl trimethylammonium chloride        |

## Synthesis and Characterization of poly(vbTMAC) and Aq-SNR

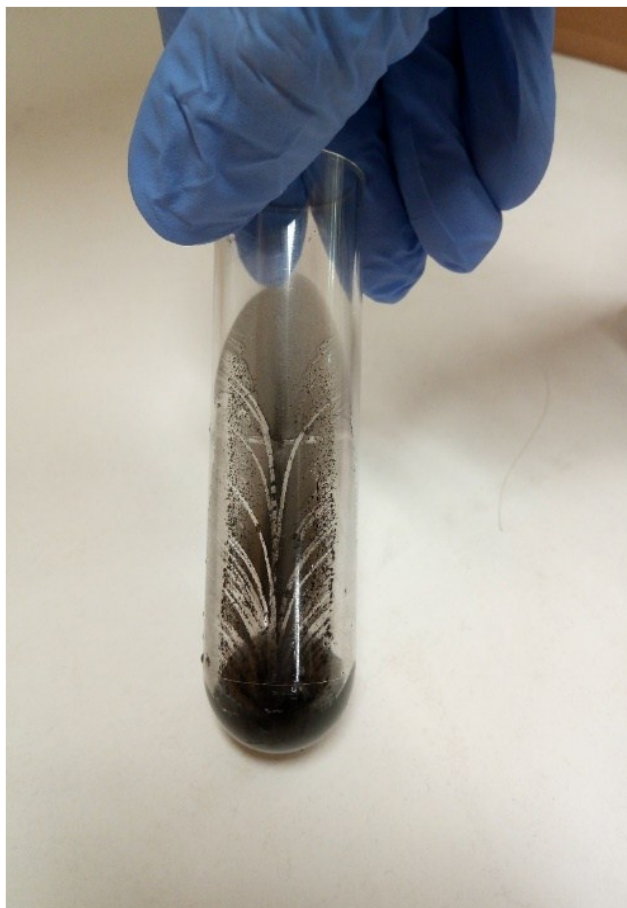

**Figure S1:** After centrifugation at 100,000 RCF (1 h), the reaction mixture deposits at the walls of the polycarbonate tubes

Removal of brine from nanoresin:

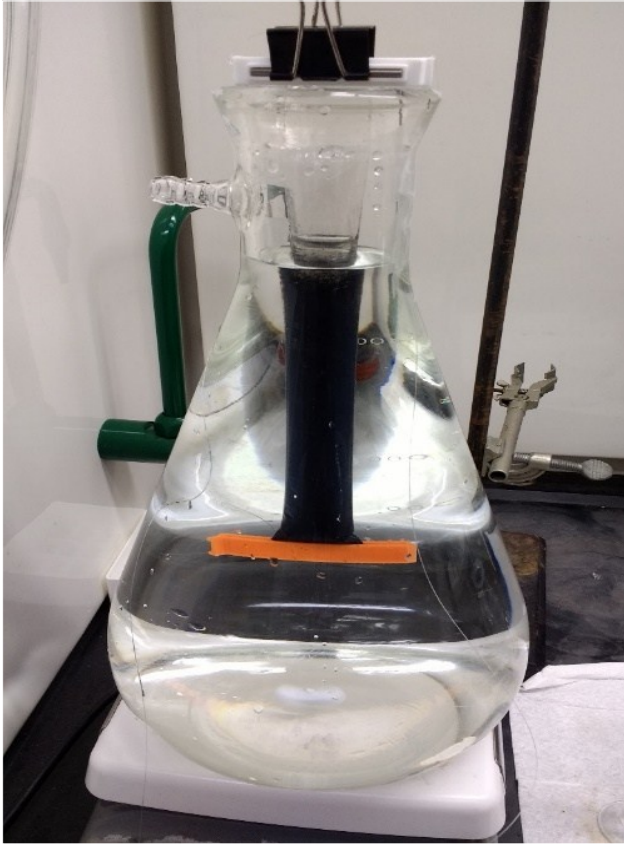

**Figure S2:** Brine Removal from **Aq-SNR** dispersion. (A) **Aq-SNR** is added in the form of dialyte and MilliQ is added as dialyzate. The dialyzate was replaced after every 2 h and the conductivity of dialyzate was checked as a function of the number of iterations. This confirms maximal removal of brine ( $<1 \mu\text{S}/\text{cm}$ )

ARGET-ATRP polymerization Scheme:

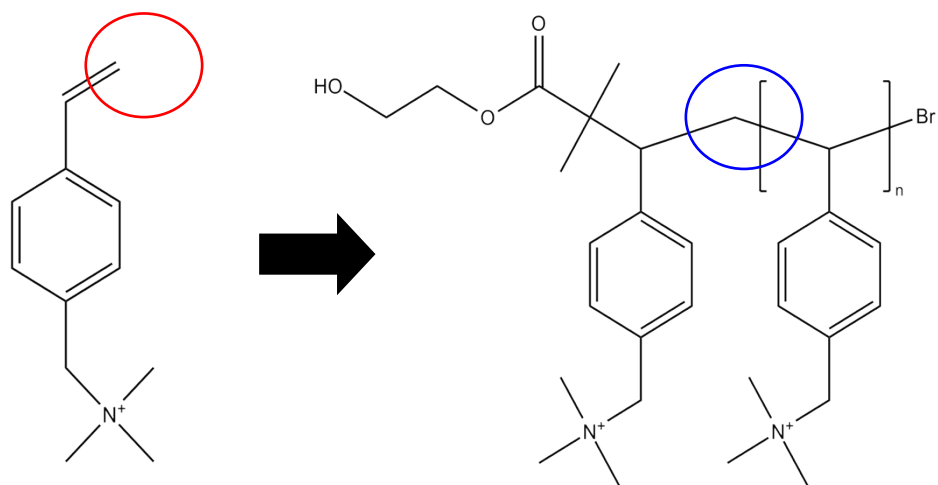

**Figure S3:** Reaction scheme showing the change from vinylic to allylic conditions for the terminal hydrogen.

Percent Conversion of Monomer:

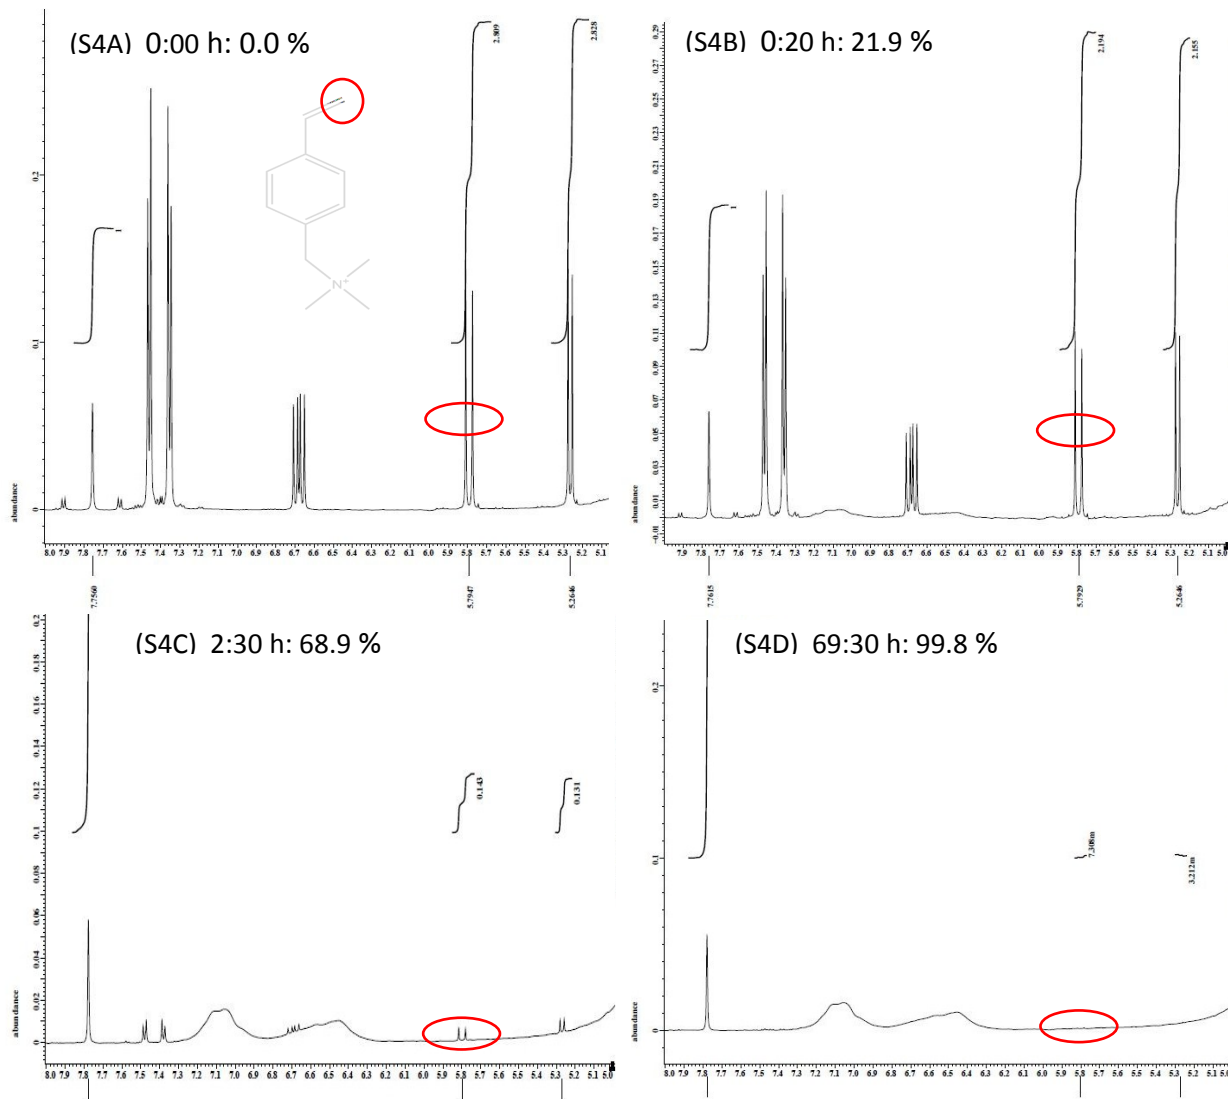

**Figure S4A:**  $^1\text{H}$  NMR Spectra of reaction mixtures from polymerization reaction versus time. To monitor the conversion of vbTMAC monomer to polymer, the vinylic proton signal (5.8 ppm, 1H, d) decreases in relation to the DMF internal standard signal (7.8 ppm, 1H, s). The ratio between initial peak integration and the integration at time t is used to determine the percent conversion.

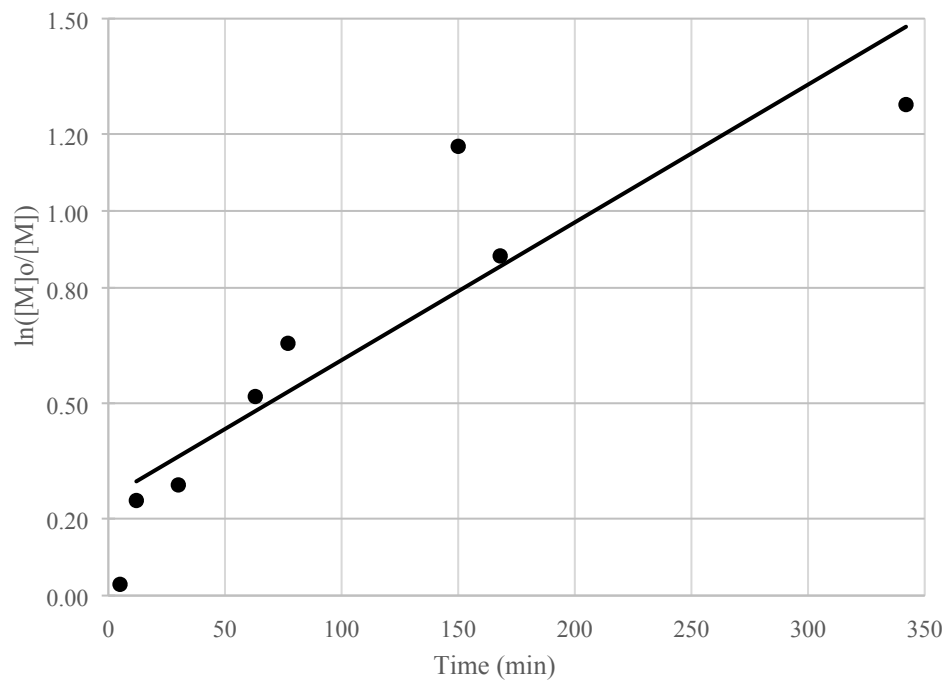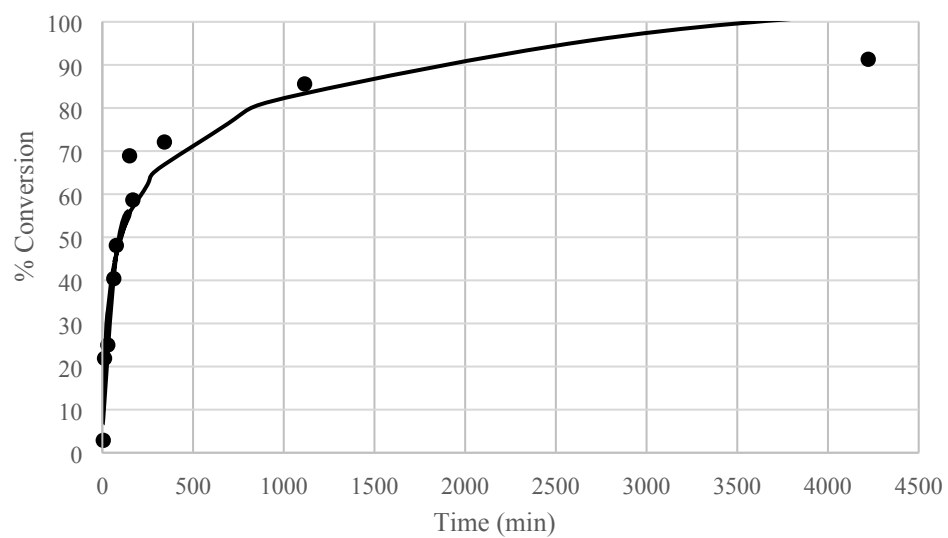

**Figure S4B:** Percent conversion (lower) and  $\ln([M]_0/[M])$  (upper) versus time. 40 min polymer growth results in 33% conversion of monomer.

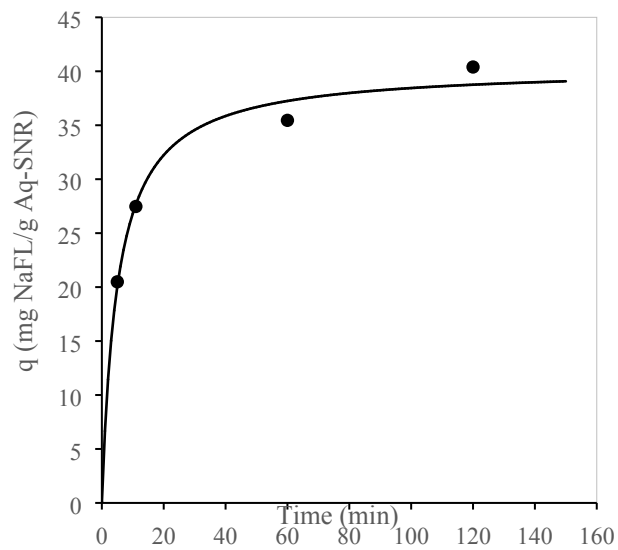

**Figure S5:** Adsorption kinetics of surrogate NOM NaFL into a thin **Aq-SNR** membrane. Pseudo-second order diffusive kinetics model fit to the data with a rate constant  $k = 0.0048 \text{ s}^{-1} (\text{mg/g})^{-1}$



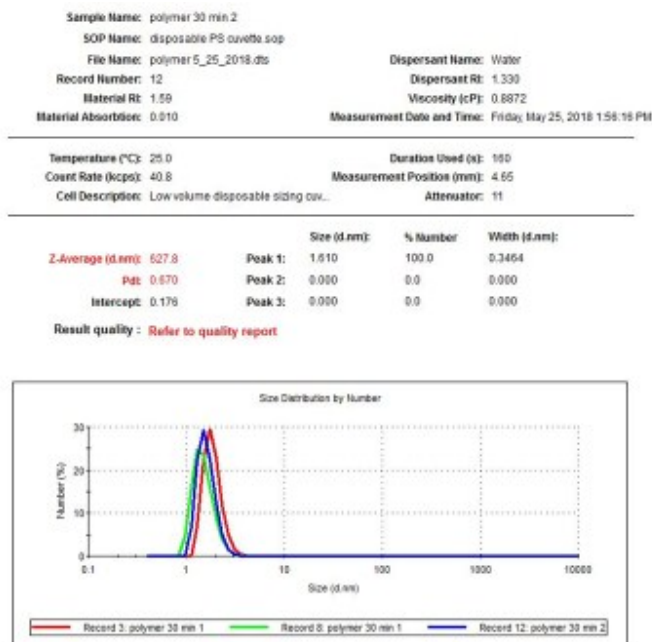

**Figure :** Number distribution of polymer grown for 30 minutes (sample is centrifuged, dialyzed and pushed through Anotop filter 0.020  $\mu\text{m}$  pore size)

| Sample name                    | Hydrodynamic diameter (nm) |
|--------------------------------|----------------------------|
| Polymer 30 min 1 <sup>st</sup> | 1.860                      |
| Polymer 30 min 2 <sup>nd</sup> | 1.509                      |
| Polymer 30 min 3 <sup>rd</sup> | 1.610                      |

**Figure S6A:** DLS characterization of ionomer after 30 min of growth or 25% conversion. Hydrodynamic effective diameter analyzed from three runs. Three syntheses with the same work up were measured. All data shown.

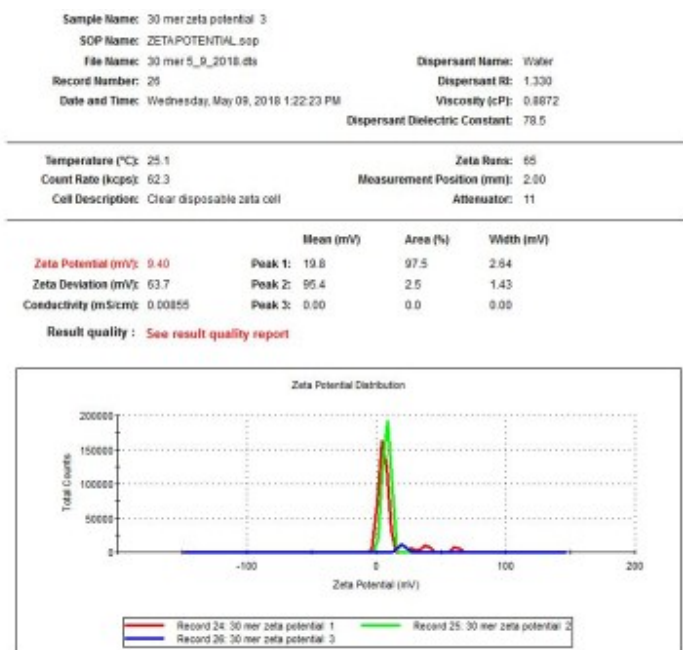

**Figure :** Zeta potential of polymer grown for 30 minutes (sample is centrifuged and dialyzed)

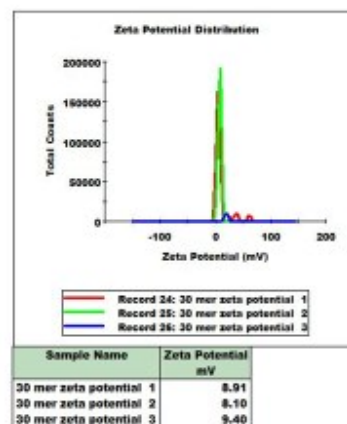

**Figure S6B:** Zeta potential characterization of ionomer after 30 min of growth or 25% conversion. Average zeta potential is 8.8 mV. All data shown.

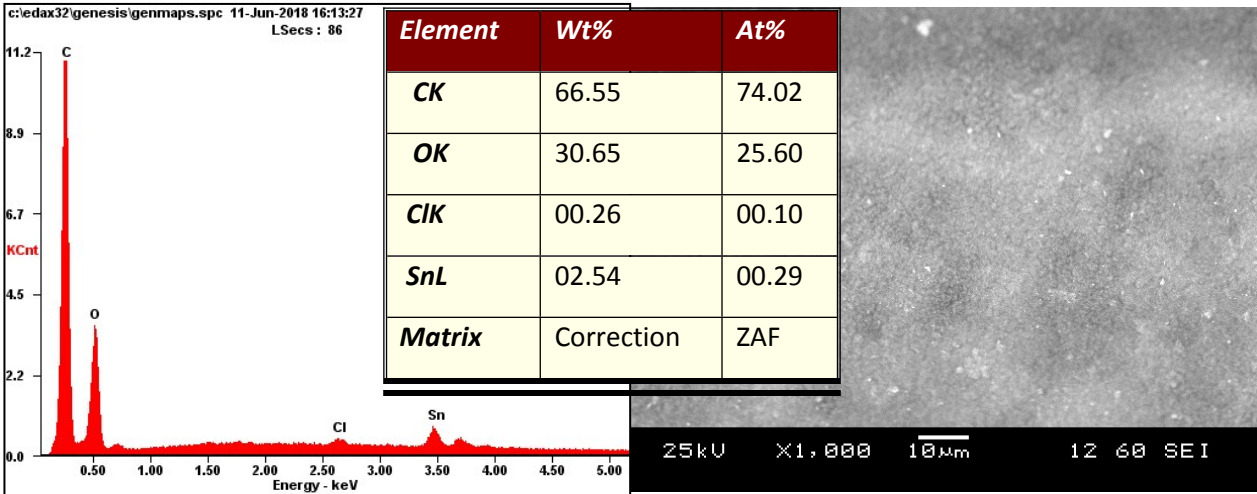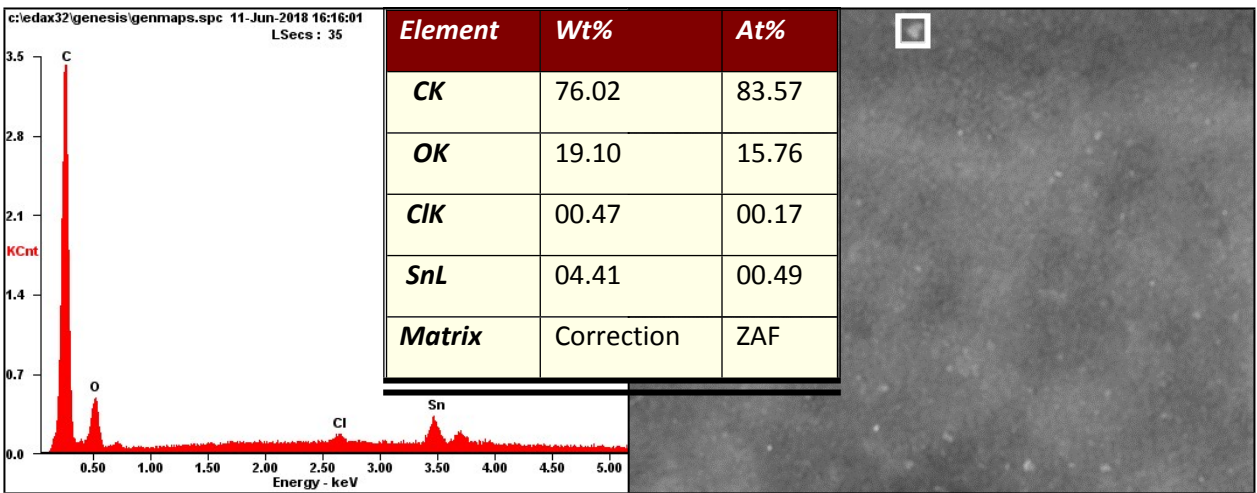

**Figure S7:** EDX of 2 h Aq-SNR thin film on MCE membrane. Small particles of tin compound still present after acid treatment. Could be tin(IV) oxide. Both images acquired at 25kV with the same 10 µm scale bar as shown in upper image. Lower data is of the small area in the box surrounding a particle. Sn concentration is twice as high on that spot indicating that persistence of insoluble tin(IV) oxide.

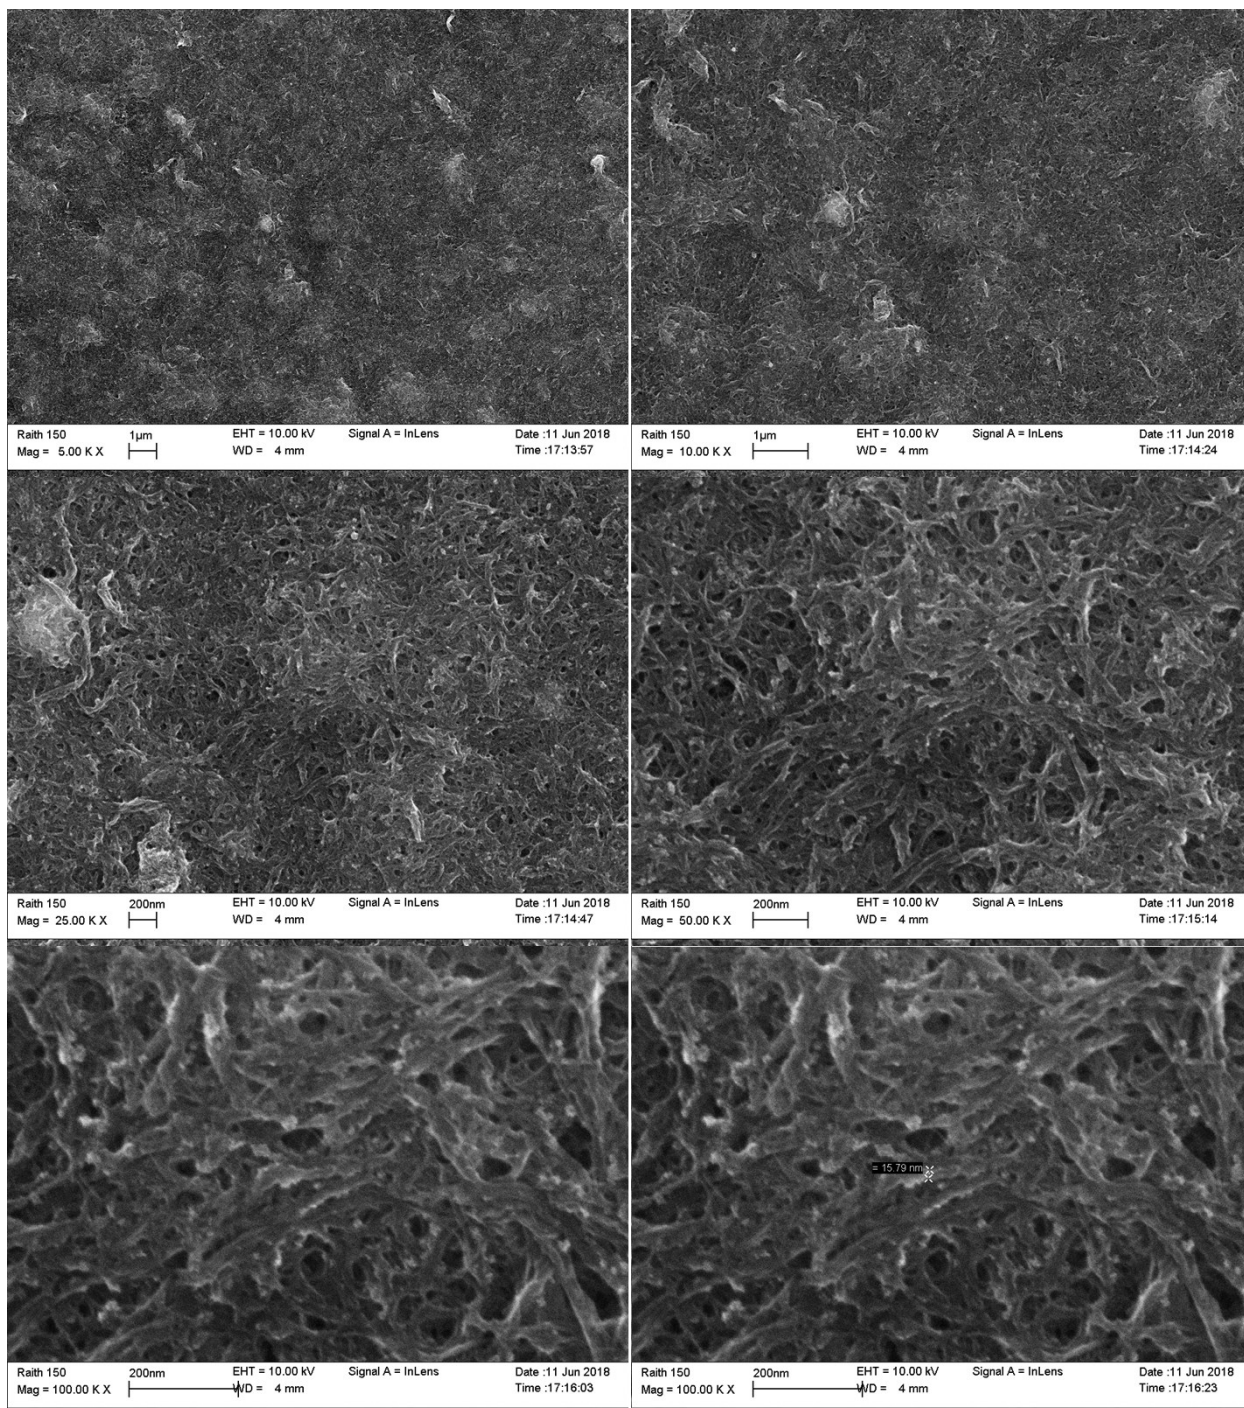

**Figure S8:** FE-SEM micrographs of Aq-SNR thin film on top of an MCE membrane. Pin hole free, smooth films were made with areas up to 16 cm<sup>2</sup>. Scale up to large area membranes is beyond the scope of this proof of principle study.

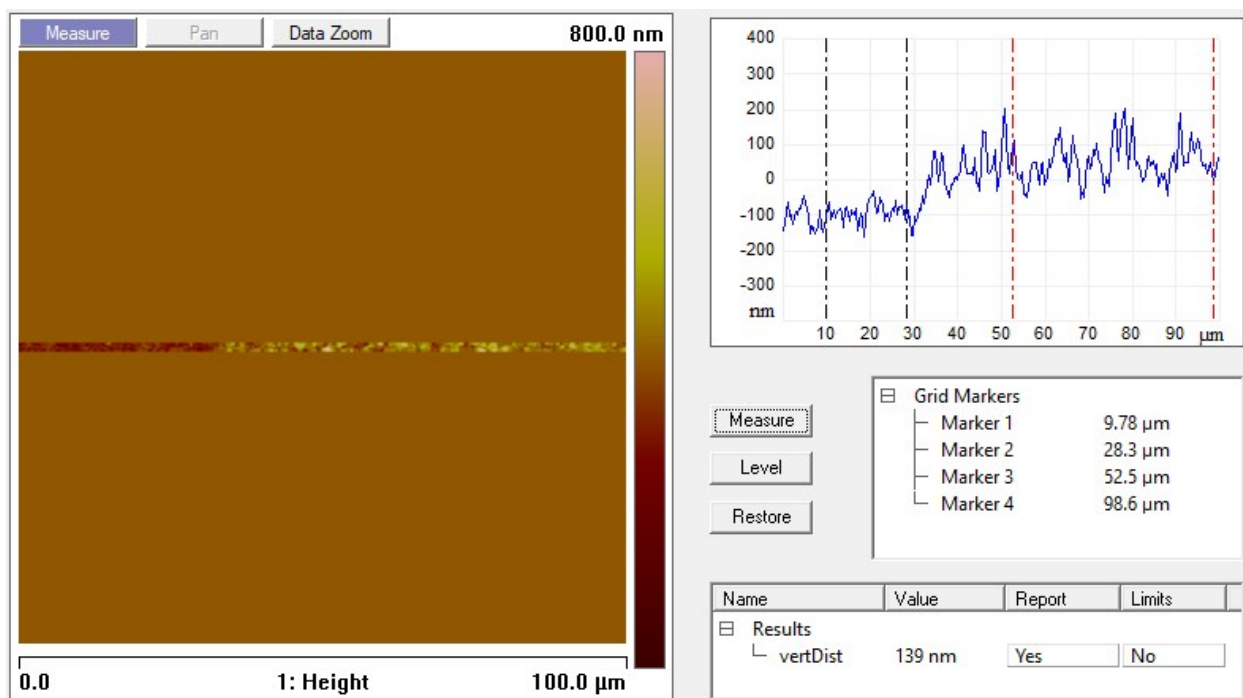

**Figure S9:** AFM micrographs of **Aq-SNR** thin film on top of an MCE membrane. Cross sectional analysis shows about a 140nm thick film. The AFM tip seems to be interacting strongly with the ionomer film. These films are not completely dry.

# Covalent attachment analysis

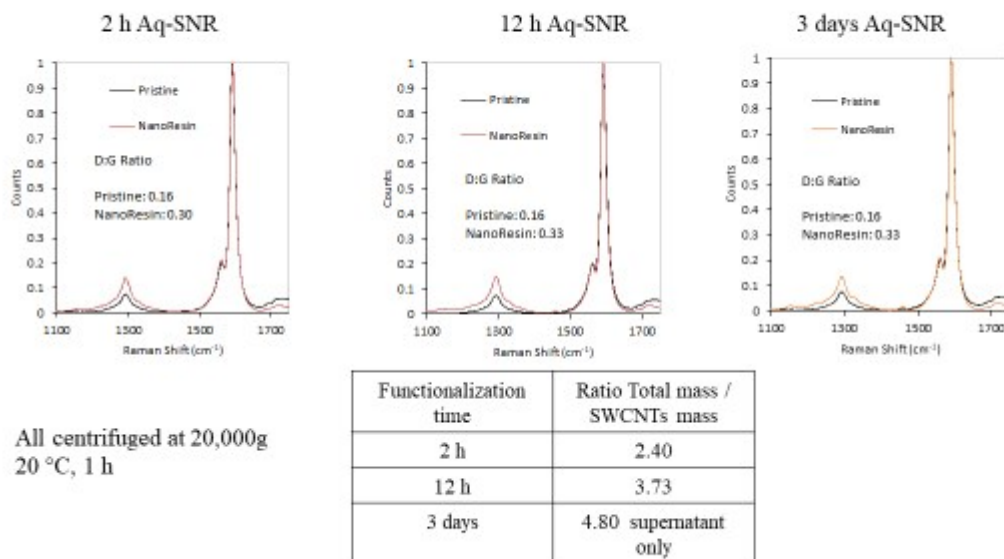

**Figure S10A:** Baseline-Normalized Raman spectra of Pristine SWCNT compared to: 2h (left), 12h (center), and 3 day (right) **Aq-SNR** after centrifugation at 20,000 RCF for 1 hr. Increase in the ratio of the area under the D and G bands (the D:G ratio) indicates covalent functionalization of ionomer strands to SWCNT wall. Total mass of **Aq-SNR** to SWCNT mass shown in table.

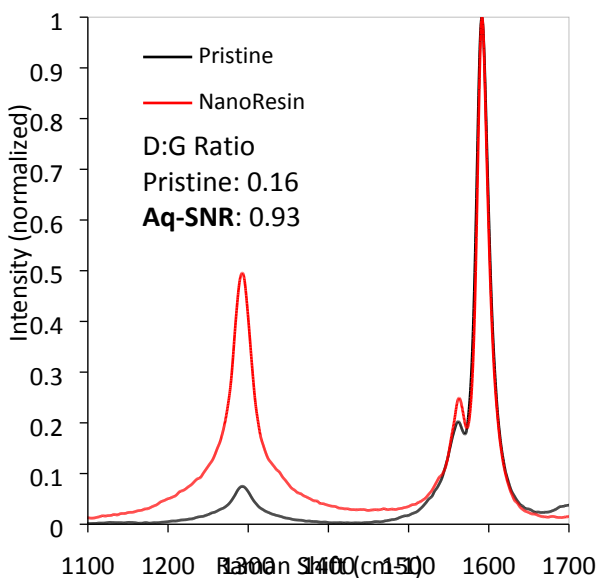

**Figure S10B:** Baseline-Normalized Raman spectra of Pristine SWCNT and 3 day **Aq-SNR** after centrifugation at 200,000 RCF for 1 hr. Increase in the ratio of the area under the D and G bands (the D:G ratio) indicates covalent functionalization of ionomer strands to SWCNT wall.

## DLS/Zeta analysis

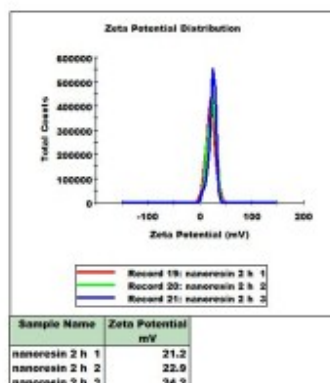

Before centrifugation

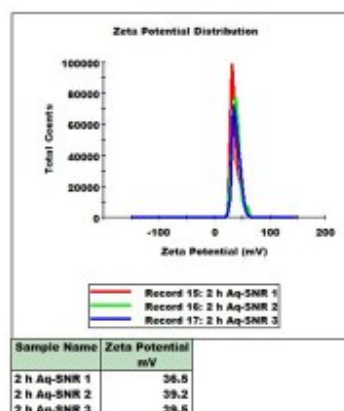

After centrifugation at 20,000 g

## DLS/Zeta analysis

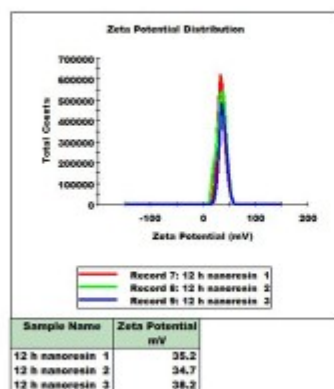

Before centrifugation

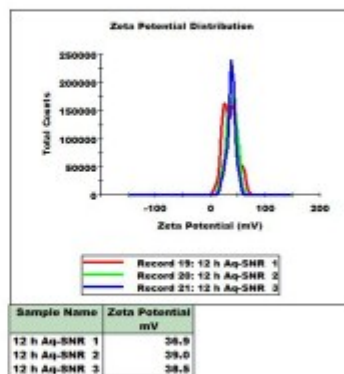

After centrifugation at 20,000 g

**Figure S11:** Zeta potential data for 2h (top) and 12 h (bottom) functionalized Aq-SNR. Material from the supernatant after a 20,000 g centrifugation exhibit a more stable dispersion and higher zeta potential. All Zeta potentials were calculated from the measured electrophoretic mobility using the Smoluchowski model.

# DLS/Zeta analysis

Number distributions of 2h Aq-SNR

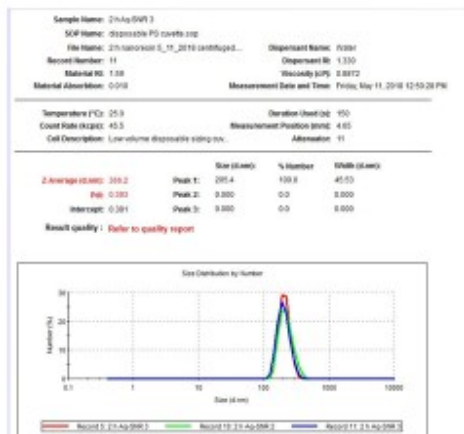

| Sample name                | Hydrodynamic diameter (nm) |
|----------------------------|----------------------------|
| 2 Aq-SNR 1 <sup>st</sup>   | 210.8                      |
| 2 h Aq-SNR 2 <sup>nd</sup> | 224.0                      |
| 2 h Aq-SNR 3 <sup>rd</sup> | 205.4                      |

Centrifuged at 20,000g

Avg ± standard error: 213.4 ± 5.520 nm

Number distributions of 12h Aq-SNR

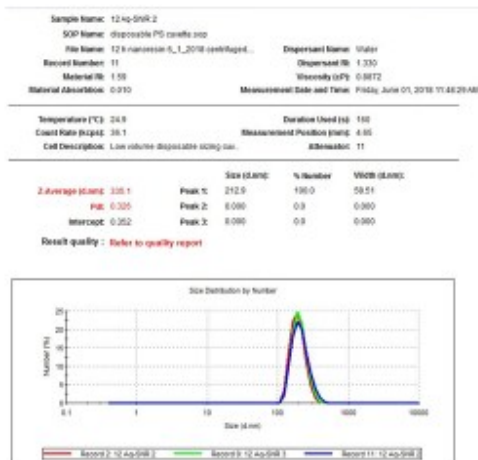

| Sample name                 | Hydrodynamic diameter (nm) |
|-----------------------------|----------------------------|
| 12 Aq-SNR 1 <sup>st</sup>   | 196.5                      |
| 12 h Aq-SNR 2 <sup>nd</sup> | 205.9                      |
| 12 h Aq-SNR 3 <sup>rd</sup> | 212.9                      |

Centrifuged at 20,000g

Avg ± standard error: 205.1 ± 4.750 nm

Number distributions of 3 days Aq-SNR

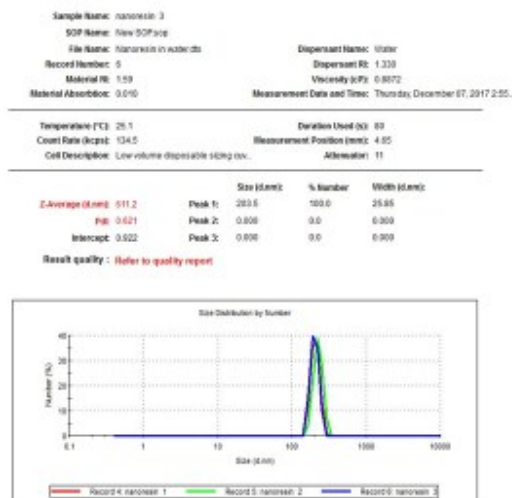

| Sample name                   | Hydrodynamic diameter (nm) |
|-------------------------------|----------------------------|
| 3 days Aq-SNR 1 <sup>st</sup> | 208.6                      |
| 3 days Aq-SNR 2 <sup>nd</sup> | 226.8                      |
| 3 days Aq-SNR 3 <sup>rd</sup> | 203.5                      |

Centrifuged at 20,000g

Avg ± standard error: 213.0 ± 7.070 nm

**Figure S12:** DLS data for 2h (top), 12 h (middle) and 3 day (bottom) functionalized Aq-SNR. Material from the supernatant after a 20,000 g centrifugation are consistent with a flexible rod model.

# Comparisons of NanoResins

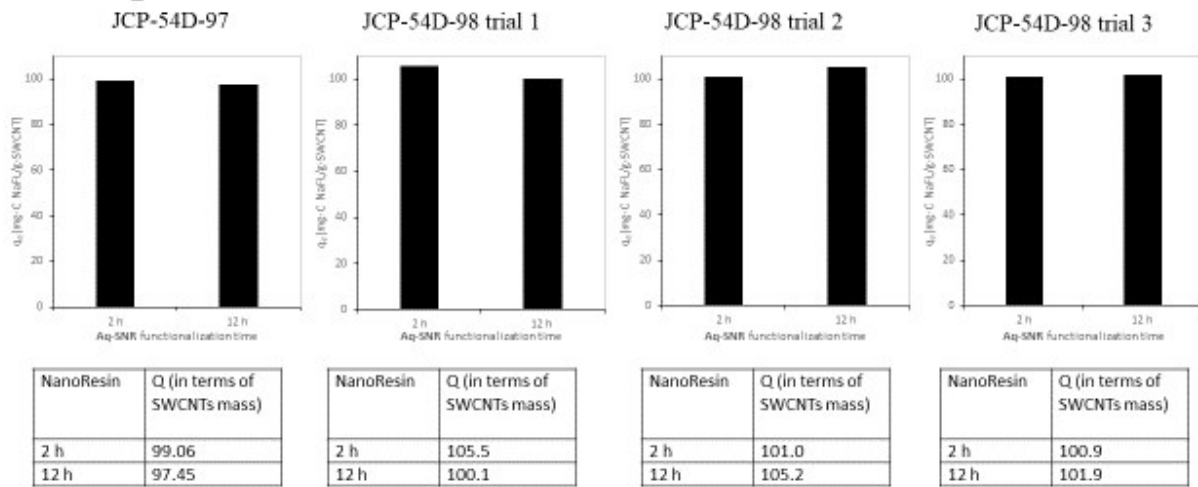

**Figure S13:** Equilibrium loading capacity of NaFL onto Aq-SNR using an initial concentration  $C_0 = 5.8 \text{ mg-C / L}$ . The mass of the adsorbent is the SWCNT mass only so we can directly compare the material based on number of nanotubes in the film. Value of  $q_e$  listed in tables.



**Table S1:** Adsorption of various analytes onto **Aq-SNR** thin films.

| <b>Adsorbate</b>                  | <b>Initial Conc. C<sub>i</sub> (mg-C/L)</b> | <b>Final Conc. C<sub>f</sub> (mg-C/L)</b> | <b>Adsorbate Volume (mL)</b> | <b>Mass of Adsorbate removed (mg)</b> | <b>Mass of Adsorbent (NanoResin) (mg)</b> | <b>q (mg-C adsorbate / g adsorbent)</b> |
|-----------------------------------|---------------------------------------------|-------------------------------------------|------------------------------|---------------------------------------|-------------------------------------------|-----------------------------------------|
| <b>NaFL</b>                       | 5.49                                        | 3.79                                      | 3.00                         | 5.11x10 <sup>-3</sup>                 | 0.17                                      | 30.1                                    |
| <b>PFOA</b>                       | 4.31                                        | 1.82                                      | 3.00                         | 7.47x10 <sup>-3</sup>                 | 0.17                                      | 43.9                                    |
| <b>PFOS</b>                       | 5.07                                        | 1.41                                      | 3.00                         | 1.09 x10 <sup>-2</sup>                | 0.17                                      | 64.6                                    |
| <b>Tetracycline hydrochloride</b> | 4.35                                        | 3.85                                      | 3.00                         | 1.50x10 <sup>-3</sup>                 | 0.17                                      | 8.82                                    |
| <b>Carbenicillin disodium</b>     | 6.67                                        | 3.42                                      | 3.00                         | 9.77x10 <sup>-3</sup>                 | 0.17                                      | 57.5                                    |
| <b>Bromoacetic acid</b>           | 3.41                                        | 1.87                                      | 3.00                         | 4.65x10 <sup>-3</sup>                 | 0.17                                      | 27.3                                    |
| <b>Chloroacetic acid</b>          | 2.54                                        | 1.80                                      | 3.00                         | 2.22x10 <sup>-3</sup>                 | 0.17                                      | 13.1                                    |
| <b>Bentazon</b>                   | 6.81                                        | 3.93                                      | 3.00                         | 8.66x10 <sup>-3</sup>                 | 0.17                                      | 50.9                                    |
| <b>Terbacil</b>                   | 6.15                                        | 4.65                                      | 3.00                         | 4.50x10 <sup>-3</sup>                 | 0.17                                      | 26.5                                    |
| <b>Bromacil</b>                   | 5.55                                        | 3.90                                      | 3.00                         | 4.95x10 <sup>-3</sup>                 | 0.17                                      | 29.1                                    |
